# Supplementary material for: A Six-Year Retrospective Study of Microbiological Characteristics and Antimicrobial Resistance in Specimens from a Tertiary Hospital’s Surgical Ward
Source: MDPI journal article supplement (doi:10.3390/antibiotics12030490), 2023-03-01
Supplement: s1 [file s1]

**Table S1.** Microbiological data of the pathogens isolated from patients' samples.

| Pathogen                           | Number of Isolates (% for That Specific Year) |                   |                    |                    |                    |                    |                    |
|------------------------------------|-----------------------------------------------|-------------------|--------------------|--------------------|--------------------|--------------------|--------------------|
|                                    | 2016                                          | 2017              | 2018               | 2019               | 2020               | 2021               | 2016-2021          |
| <b>Gram-positives</b>              | <b>84 (51.53)</b>                             | <b>86 (43.65)</b> | <b>109 (42.91)</b> | <b>112 (48.48)</b> | <b>150 (45.05)</b> | <b>134 (47.67)</b> | <b>675 (46.26)</b> |
| <i>Enterococcus faecalis</i>       | 20 (12.27)                                    | 24 (12.18)        | 27 (10.63)         | 32 (13.85)         | 41 (12.31)         | 19 (6.76)          | 163 (11.17)        |
| <i>Enterococcus faecium</i>        | 11 (6.75)                                     | 11 (5.58)         | 12 (4.72)          | 22 (9.52)          | 40 (12.01)         | 33 (11.74)         | 129 (8.84)         |
| <i>Staphylococcus epidermidis</i>  | 10 (6.13)                                     | 7 (3.55)          | 19 (7.48)          | 15 (6.49)          | 14 (4.20)          | 22 (7.83)          | 87 (5.96)          |
| <i>Staphylococcus aureus</i>       | 6 (3.68)                                      | 9 (4.57)          | 12 (4.72)          | 3 (1.30)           | 6 (1.80)           | 8 (2.85)           | 44 (3.01)          |
| <i>Streptococcus anginosus</i>     | 7 (4.29)                                      | 7 (3.55)          | 4 (1.57)           | 5 (2.16)           | 4 (1.20)           | 5 (1.78)           | 32 (2.19)          |
| <i>Staphylococcus haemolyticus</i> | 2 (1.23)                                      | 5 (2.54)          | 3 (1.18)           | 4 (1.73)           | 1 (0.30)           | 8 (2.85)           | 23 (1.57)          |
| <i>Staphylococcus hominis</i>      | 3 (1.84)                                      | 2 (1.02)          | 7 (2.76)           | 3 (1.30)           | 4 (1.20)           | 4 (1.42)           | 23 (1.57)          |
| <i>Streptococcus constellatus</i>  | 0 (0)                                         | 1 (0.51)          | 4 (1.57)           | 2 (0.87)           | 1 (0.30)           | 8 (2.85)           | 16 (1.09)          |
| <i>Enterococcus avium</i>          | 0 (0)                                         | 2 (1.02)          | 2 (0.79)           | 2 (0.87)           | 6 (1.80)           | 2 (0.71)           | 14 (0.96)          |
| <i>Streptococcus mitis</i>         | 3 (1.84)                                      | 3 (1.52)          | 2 (0.79)           | 2 (0.87)           | 2 (0.60)           | 1 (0.36)           | 13 (0.89)          |
| <i>Enterococcus gallinarum</i>     | 1 (0.61)                                      | 3 (1.52)          | 2 (0.79)           | 2 (0.87)           | 4 (1.20)           | 0 (0)              | 12 (0.82)          |
| <i>Streptococcus salivarius</i>    | 3 (1.84)                                      | 1 (0.51)          | 0 (0)              | 1 (0.43)           | 3 (0.90)           | 2 (0.71)           | 10 (0.69)          |

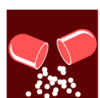

|                           |          |          |          |          |          |          |          |
|---------------------------|----------|----------|----------|----------|----------|----------|----------|
| <i>Staphylococcus</i>     |          |          |          |          |          |          |          |
| <i>lugdunensis</i>        | 1 (0.61) | 1 (0.51) | 2 (0.79) | 1 (0.43) | 1 (0.30) | 2 (0.71) | 8 (0.54) |
| <i>Streptococcus</i>      |          |          |          |          |          |          |          |
| <i>gordonii</i>           | 0 (0)    | 0 (0)    | 2 (0.79) | 3 (1.30) | 1 (0.30) | 1 (0.36) | 7 (0.48) |
| <i>Streptococcus</i>      |          |          |          |          |          |          |          |
| <i>sanguinis</i>          | 2 (1.23) | 1 (0.51) | 1 (0.39) | 1 (0.43) | 1 (0.30) | 0 (0)    | 6 (0.41) |
| <i>Clostridium</i>        |          |          |          |          |          |          |          |
| <i>perfringens</i>        | 0 (0)    | 0 (0)    | 1 (0.39) | 3 (1.30) | 1 (0.30) | 0 (0)    | 5 (0.34) |
| <i>Enterococcus</i>       |          |          |          |          |          |          |          |
| <i>durans</i>             | 1 (0.61) | 0 (0)    | 1 (0.39) | 0 (0)    | 2 (0.60) | 1 (0.36) | 5 (0.34) |
| <i>Staphylococcus</i>     |          |          |          |          |          |          |          |
| <i>coagulase negative</i> | 4 (2.45) | 1 (0.51) | 0 (0)    | 0 (0)    | 0 (0)    | 0 (0)    | 5 (0.34) |
| <i>Corynebacterium</i>    |          |          |          |          |          |          |          |
| <i>striatum</i>           | 0 (0)    | 0 (0)    | 0 (0)    | 0 (0)    | 3 (0.90) | 1 (0.36) | 4 (0.27) |
| <i>Propionibacterium</i>  |          |          |          |          |          |          |          |
| <i>granulosum</i>         | 1 (0.61) | 0 (0)    | 0 (0)    | 2 (0.87) | 1 (0.30) | 0 (0)    | 4 (0.27) |
| <i>Corynebacterium</i>    |          |          |          |          |          |          |          |
| <i>amycolatum</i>         | 0 (0)    | 0 (0)    | 0 (0)    | 0 (0)    | 1 (0.30) | 2 (0.71) | 3 (0.21) |
| <i>Peptostreptococcus</i> |          |          |          |          |          |          |          |
| <i>anaerobius</i>         | 1 (0.61) | 0 (0)    | 1 (0.39) | 0 (0)    | 0 (0)    | 1 (0.36) | 3 (0.21) |
| <i>Streptococcus</i>      |          |          |          |          |          |          |          |
| <i>alactolyticus</i>      | 0 (0)    | 1 (0.51) | 0 (0)    | 0 (0)    | 0 (0)    | 2 (0.71) | 3 (0.21) |
| <i>Streptococcus</i>      |          |          |          |          |          |          |          |
| <i>gallolyticus</i>       | 0 (0)    | 0 (0)    | 0 (0)    | 0 (0)    | 2 (0.60) | 1 (0.36) | 3 (0.21) |
| <i>Streptococcus</i>      |          |          |          |          |          |          |          |
| <i>intermedius</i>        | 1 (0.61) | 1 (0.51) | 0 (0)    | 0 (0)    | 0 (0)    | 1 (0.36) | 3 (0.21) |
| <i>Streptococcus</i>      |          |          |          |          |          |          |          |
| <i>parasanguinis</i>      | 0 (0)    | 0 (0)    | 1 (0.39) | 0 (0)    | 1 (0.30) | 1 (0.36) | 3 (0.21) |



|                              |          |          |          |          |          |          |          |
|------------------------------|----------|----------|----------|----------|----------|----------|----------|
| <i>Actinomyces</i>           |          |          |          |          |          |          |          |
| <i>turicensis</i>            | 1 (0.61) | 0 (0)    | 0 (0)    | 0 (0)    | 0 (0)    | 1 (0.36) | 2 (0.14) |
| <i>Enterococcus hirae</i>    | 1 (0.61) | 0 (0)    | 0 (0)    | 0 (0)    | 1 (0.30) | 0 (0)    | 2 (0.14) |
| <i>Fingoldia magna</i>       | 1 (0.61) | 1 (0.51) | 0 (0)    | 0 (0)    | 0 (0)    | 0 (0)    | 2 (0.14) |
| <i>Micrococcus luteus</i>    | 0 (0)    | 0 (0)    | 0 (0)    | 0 (0)    | 2 (0.60) | 0 (0)    | 2 (0.14) |
| <i>Rothia mucilaginosa</i>   | 0 (0)    | 0 (0)    | 0 (0)    | 2 (0.87) | 0 (0)    | 0 (0)    | 2 (0.14) |
| <i>Staphylococcus</i>        |          |          |          |          |          |          |          |
| <i>cohnii</i>                | 1 (0.61) | 0 (0)    | 0 (0)    | 1 (0.43) | 0 (0)    | 0 (0)    | 2 (0.14) |
| <i>Staphylococcus</i>        |          |          |          |          |          |          |          |
| <i>saprophyticus</i>         | 0 (0)    | 0 (0)    | 0 (0)    | 0 (0)    | 1 (0.30) | 1 (0.36) | 2 (0.14) |
| <i>Streptococcus</i>         |          |          |          |          |          |          |          |
| <i>milleri</i>               | 0 (0)    | 0 (0)    | 1 (0.39) | 0 (0)    | 0 (0)    | 1 (0.36) | 2 (0.14) |
| <i>Actinobaculum</i>         | 0 (0)    | 1 (0.51) | 0 (0)    | 0 (0)    | 0 (0)    | 0 (0)    | 1 (0.07) |
| <i>schaalii</i>              |          |          |          |          |          |          |          |
| <i>Actinomyces</i>           | 0 (0)    | 0 (0)    | 0 (0)    | 0 (0)    | 0 (0)    | 1 (0.36) | 1 (0.07) |
| <i>odontolyticus</i>         |          |          |          |          |          |          |          |
| <i>Anaerococcus</i>          | 0 (0)    | 0 (0)    | 0 (0)    | 0 (0)    | 0 (0)    | 1 (0.36) | 1 (0.07) |
| <i>vaginalis</i>             |          |          |          |          |          |          |          |
| <i>Arcanobacterium</i>       | 0 (0)    | 0 (0)    | 0 (0)    | 0 (0)    | 0 (0)    | 1 (0.36) | 1 (0.07) |
| <i>haemolyticum</i>          |          |          |          |          |          |          |          |
| <i>Bacillus cereus</i>       | 0 (0)    | 0 (0)    | 0 (0)    | 0 (0)    | 0 (0)    | 1 (0.36) | 1 (0.07) |
| <i>Bifidobacterium spp</i>   | 0 (0)    | 1 (0.51) | 0 (0)    | 0 (0)    | 0 (0)    | 0 (0)    | 1 (0.07) |
| <i>Clostridium</i>           | 0 (0)    | 0 (0)    | 0 (0)    | 0 (0)    | 1 (0.30) | 0 (0)    | 1 (0.07) |
| <i>bifermentans</i>          |          |          |          |          |          |          |          |
| <i>Clostridium</i>           | 0 (0)    | 0 (0)    | 0 (0)    | 0 (0)    | 0 (0)    | 1 (0.36) | 1 (0.07) |
| <i>clostridioforme</i>       |          |          |          |          |          |          |          |
| <i>Clostridium difficile</i> | 0 (0)    | 0 (0)    | 1 (0.39) | 0 (0)    | 0 (0)    | 0 (0)    | 1 (0.07) |

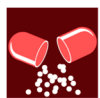

|                                       |          |          |          |          |          |          |          |
|---------------------------------------|----------|----------|----------|----------|----------|----------|----------|
| <i>Clostridium sporogenes</i>         | 0 (0)    | 0 (0)    | 1 (0.39) | 0 (0)    | 0 (0)    | 0 (0)    | 1 (0.07) |
| <i>Corynebacterium jeikeium</i>       | 0 (0)    | 0 (0)    | 0 (0)    | 0 (0)    | 1 (0.30) | 0 (0)    | 1 (0.07) |
| <i>Corynebacterium spp</i>            | 0 (0)    | 0 (0)    | 0 (0)    | 0 (0)    | 1 (0.30) | 0 (0)    | 1 (0.07) |
| <i>Corynebacterium ulcerans</i>       | 0 (0)    | 0 (0)    | 0 (0)    | 1 (0.43) | 0 (0)    | 0 (0)    | 1 (0.07) |
| <i>Eggerthella lenta</i>              | 0 (0)    | 0 (0)    | 1 (0.39) | 0 (0)    | 0 (0)    | 0 (0)    | 1 (0.07) |
| <i>Enterococcus casseliflavus</i>     | 0 (0)    | 1 (0.51) | 0 (0)    | 0 (0)    | 0 (0)    | 0 (0)    | 1 (0.07) |
| <i>Gemella morbillorum</i>            | 0 (0)    | 0 (0)    | 0 (0)    | 1 (0.43) | 0 (0)    | 0 (0)    | 1 (0.07) |
| <i>Lactococcus garvieae</i>           | 0 (0)    | 0 (0)    | 0 (0)    | 0 (0)    | 1 (0.30) | 0 (0)    | 1 (0.07) |
| <i>Parvimonas micra</i>               | 0 (0)    | 0 (0)    | 0 (0)    | 0 (0)    | 0 (0)    | 1 (0.36) | 1 (0.07) |
| <i>Peptoniphilus asaccharolyticus</i> | 0 (0)    | 0 (0)    | 1 (0.39) | 0 (0)    | 0 (0)    | 0 (0)    | 1 (0.07) |
| <i>Propionibacterium propionicus</i>  | 1 (0.61) | 0 (0)    | 0 (0)    | 0 (0)    | 0 (0)    | 0 (0)    | 1 (0.07) |
| <i>Staphylococcus sciuri</i>          | 0 (0)    | 0 (0)    | 0 (0)    | 1 (0.43) | 0 (0)    | 0 (0)    | 1 (0.07) |
| <i>Staphylococcus warneri</i>         | 0 (0)    | 0 (0)    | 0 (0)    | 1 (0.43) | 0 (0)    | 0 (0)    | 1 (0.07) |
| <i>Streptococcus agalactiae</i>       | 1 (0.61) | 0 (0)    | 0 (0)    | 0 (0)    | 0 (0)    | 0 (0)    | 1 (0.07) |
| <i>Streptococcus dysgalactiae</i>     | 0 (0)    | 0 (0)    | 1 (0.39) | 0 (0)    | 0 (0)    | 0 (0)    | 1 (0.07) |



|                                     |                   |                   |                    |                   |                    |                    |                    |
|-------------------------------------|-------------------|-------------------|--------------------|-------------------|--------------------|--------------------|--------------------|
| <i>Streptococcus gallinarum</i>     | 0 (0)             | 0 (0)             | 0 (0)              | 0 (0)             | 1 (0.30)           | 0 (0)              | 1 (0.07)           |
| <i>Streptococcus infantarius</i>    | 0 (0)             | 0 (0)             | 0 (0)              | 0 (0)             | 1 (0.30)           | 0 (0)              | 1 (0.07)           |
| <i>Streptococcus pseudoporcinus</i> | 0 (0)             | 1 (0.51)          | 0 (0)              | 0 (0)             | 0 (0)              | 0 (0)              | 1 (0.07)           |
| <i>Streptococcus pyogenes</i>       | 0 (0)             | 1 (0.51)          | 0 (0)              | 0 (0)             | 0 (0)              | 0 (0)              | 1 (0.07)           |
| <i>Streptococcus viridans</i>       | 0 (0)             | 0 (0)             | 0 (0)              | 1 (0.43)          | 0 (0)              | 0 (0)              | 1 (0.07)           |
| <i>Turicella otitidis</i>           | 0 (0)             | 0 (0)             | 0 (0)              | 1 (0.43)          | 0 (0)              | 0 (0)              | 1 (0.07)           |
| <i>Vagococcus fluvialis</i>         | 1 (0.61)          | 0 (0)             | 0 (0)              | 0 (0)             | 0 (0)              | 0 (0)              | 1 (0.07)           |
| <b>Gram-negatives</b>               | <b>71 (43.56)</b> | <b>89 (45.18)</b> | <b>124 (48.82)</b> | <b>99 (42.86)</b> | <b>154 (46.25)</b> | <b>118 (41.99)</b> | <b>655 (44.89)</b> |
| <i>Escherichia coli</i>             | 26 (15.95)        | 30 (15.22)        | 48 (18.90)         | 25 (10.82)        | 43 (12.91)         | 51 (18.15)         | 223 (15.28)        |
| <i>Pseudomonas aeruginosa</i>       | 6 (3.68)          | 20 (10.15)        | 15 (5.91)          | 11 (4.76)         | 19 (5.71)          | 16 (5.69)          | 87 (5.96)          |
| <i>Enterobacter cloacae</i>         | 7 (4.29)          | 11 (5.58)         | 10 (3.94)          | 9 (3.90)          | 17 (5.11)          | 9 (3.20)           | 63 (4.31)          |
| <i>Klebsiella pneumoniae</i>        | 6 (3.68)          | 2 (1.02)          | 3 (1.18)           | 13 (5.63)         | 25 (7.51)          | 12 (4.27)          | 61 (4.18)          |
| <i>Proteus mirabilis</i>            | 5 (3.07)          | 7 (3.55)          | 12 (4.72)          | 5 (2.16)          | 5 (1.50)           | 3 (1.07)           | 37 (2.53)          |
| <i>Enterobacter aerogenes</i>       | 2 (1.23)          | 4 (2.03)          | 7 (2.76)           | 4 (1.73)          | 5 (1.50)           | 2 (0.71)           | 24 (1.64)          |
| <i>Bacteroides fragilis</i>         | 7 (4.29)          | 1 (0.51)          | 8 (3.15)           | 3 (1.30)          | 1 (0.30)           | 1 (0.36)           | 21 (1.44)          |
| <i>Citrobacter freundii</i>         | 2 (1.23)          | 3 (1.52)          | 3 (1.18)           | 3 (1.30)          | 7 (2.10)           | 0 (0)              | 18 (1.23)          |
| <i>Acinetobacter baumannii</i>      | 1 (0.61)          | 1 (0.51)          | 1 (0.39)           | 6 (2.60)          | 3 (0.90)           | 4 (1.42)           | 16 (1.10)          |
| <i>Klebsiella oxytoca</i>           | 2 (1.23)          | 1 (0.51)          | 4 (1.57)           | 3 (1.30)          | 4 (1.20)           | 2 (0.71)           | 16 (1.10)          |



|                            |          |          |          |          |          |          |           |
|----------------------------|----------|----------|----------|----------|----------|----------|-----------|
| <i>Morganella</i>          |          |          |          |          |          |          |           |
| <i>morganii</i>            | 0 (0)    | 1 (0.51) | 2 (0.79) | 5 (2.16) | 4 (1.20) | 4 (1.42) | 16 (1.10) |
| <i>Bacteroides</i>         |          |          |          |          |          |          |           |
| <i>thetaiotaomicron</i>    | 0 (0)    | 0 (0)    | 2 (0.79) | 0 (0)    | 5 (1.50) | 1 (0.36) | 8 (0.55)  |
| <i>Serratia marcescens</i> | 0 (0)    | 0 (0)    | 0 (0)    | 1 (0.43) | 1 (0.30) | 3 (1.07) | 5 (0.34)  |
| <i>Aeromonas</i>           |          |          |          |          |          |          |           |
| <i>hydrophila</i>          | 0 (0)    | 0 (0)    | 0 (0)    | 1 (0.43) | 1 (0.30) | 2 (0.71) | 4 (0.27)  |
| <i>Bacteroides ovatus</i>  | 0 (0)    | 0 (0)    | 1 (0.39) | 2 (0.87) | 0 (0)    | 1 (0.36) | 4 (0.27)  |
| <i>Citrobacter braakii</i> | 1 (0.61) | 1 (0.51) | 0 (0)    | 1 (0.43) | 1 (0.30) |          | 4 (0.27)  |
| <i>Citrobacter koseri</i>  | 1 (0.61) | 0 (0)    | 2 (0.79) | 0 (0)    | 0 (0)    | 1 (0.36) | 4 (0.27)  |
| <i>Fusobacterium</i>       |          |          |          |          |          |          |           |
| <i>nucleatum</i>           | 0 (0)    | 1 (0.51) | 2 (0.79) | 0 (0)    | 0 (0)    | 1 (0.36) | 4 (0.27)  |
| <i>Stenotrophomonas</i>    |          |          |          |          |          |          |           |
| <i>malophilia</i>          | 2 (1.23) | 0 (0)    | 0 (0)    | 1 (0.43) | 1 (0.30) | 0 (0)    | 4 (0.27)  |
| <i>Enterobacter</i>        |          |          |          |          |          |          |           |
| <i>cancerogenus</i>        | 0 (0)    | 0 (0)    | 0 (0)    | 0 (0)    | 3 (0.90) | 0 (0)    | 3 (0.21)  |
| <i>Bacteroides</i>         |          |          |          |          |          |          |           |
| <i>xylanisolvens</i>       | 0 (0)    | 0 (0)    | 0 (0)    | 0 (0)    | 1 (0.30) | 1 (0.36) | 2 (0.14)  |
| <i>Chromobacterium</i>     |          |          |          |          |          |          |           |
| <i>violaceum</i>           | 0 (0)    | 0 (0)    | 0 (0)    | 0 (0)    | 2 (0.60) | 0 (0)    | 2 (0.14)  |
| <i>Haemophilus</i>         |          |          |          |          |          |          |           |
| <i>parainfluenzae</i>      | 0 (0)    | 0 (0)    | 0 (0)    | 2 (0.87) | 0 (0)    | 0 (0)    | 2 (0.14)  |
| <i>Prevotella bivia</i>    | 0 (0)    | 1 (0.51) | 1 (0.39) | 0 (0)    | 0 (0)    | 0 (0)    | 2 (0.14)  |
| <i>Proteus vulgaris</i>    | 0 (0)    | 1 (0.51) | 0 (0)    | 1 (0.43) | 0 (0)    | 0 (0)    | 2 (0.14)  |
| <i>Pseudomonas</i>         |          |          |          |          |          |          |           |
| <i>putida</i>              | 0 (0)    | 0 (0)    | 0 (0)    | 1 (0.43) | 1 (0.30) | 0 (0)    | 2 (0.14)  |
| <i>Achromobacter</i>       |          |          |          |          |          |          |           |
| <i>xylosoxidans</i>        | 0 (0)    | 0 (0)    | 1 (0.39) | 0 (0)    | 0 (0)    | 0 (0)    | 1 (0.07)  |



|                                    |                 |                   |                  |                  |                  |                   |                   |
|------------------------------------|-----------------|-------------------|------------------|------------------|------------------|-------------------|-------------------|
| <i>Acinetobacter lwoffii</i>       | 0 (0)           | 1 (0.51)          | 0 (0)            | 0 (0)            | 0 (0)            | 0 (0)             | 1 (0.07)          |
| <i>Aeromonas punctata (caviae)</i> | 0 (0)           | 0 (0)             | 0 (0)            | 0 (0)            | 0 (0)            | 1 (0.36)          | 1 (0.07)          |
| <i>Aeromonas sobria</i>            | 1 (0.61)        | 0 (0)             | 0 (0)            | 0 (0)            | 0 (0)            | 0 (0)             | 1 (0.07)          |
| <i>Aggregatibacter segnis</i>      | 0 (0)           | 0 (0)             | 0 (0)            | 1 (0.43)         | 0 (0)            | 0 (0)             | 1 (0.07)          |
| <i>Bacteroides caccae</i>          | 0 (0)           | 0 (0)             | 0 (0)            | 0 (0)            | 1 (0.30)         | 0 (0)             | 1 (0.07)          |
| <i>Bacteroides eggerthii</i>       | 0 (0)           | 0 (0)             | 0 (0)            | 0 (0)            | 1 (0.30)         | 0 (0)             | 1 (0.07)          |
| <i>Campylobacter coli</i>          | 0 (0)           | 1 (0.51)          | 0 (0)            | 0 (0)            | 0 (0)            | 0 (0)             | 1 (0.07)          |
| <i>Citrobacter amalonaticus</i>    | 0 (0)           | 1 (0.51)          | 0 (0)            | 0 (0)            | 0 (0)            | 0 (0)             | 1 (0.07)          |
| <i>Citrobacter youngae</i>         | 1 (0.61)        | 0 (0)             | 0 (0)            | 0 (0)            | 0 (0)            |                   | 1 (0.07)          |
| <i>Haemophilus segnis</i>          | 0 (0)           | 1 (0.51)          | 0 (0)            | 0 (0)            | 0 (0)            | 0 (0)             | 1 (0.07)          |
| <i>Klebsiella aerogenes</i>        | 0 (0)           | 0 (0)             | 0 (0)            | 0 (0)            | 0 (0)            | 1 (0.36)          | 1 (0.07)          |
| <i>Lelliottia amnigena</i>         | 0 (0)           | 0 (0)             | 0 (0)            | 0 (0)            | 0 (0)            | 1 (0.36)          | 1 (0.07)          |
| <i>Prevotella melaninogenica</i>   | 0 (0)           | 0 (0)             | 0 (0)            | 0 (0)            | 1 (0.30)         | 0 (0)             | 1 (0.07)          |
| <i>Prevotella oralis</i>           | 0 (0)           | 0 (0)             | 1 (0.39)         | 0 (0)            | 0 (0)            | 0 (0)             | 1 (0.07)          |
| <i>Proteus hauseri</i>             | 0 (0)           | 0 (0)             | 0 (0)            | 1 (0.43)         | 0 (0)            | 0 (0)             | 1 (0.07)          |
| <i>Providencia stuartii</i>        | 1 (0.61)        | 0 (0)             | 0 (0)            | 0 (0)            | 0 (0)            | 0 (0)             | 1 (0.07)          |
| <i>Shewanella algae</i>            | 0 (0)           | 0 (0)             | 0 (0)            | 0 (0)            | 1 (0.30)         | 0 (0)             | 1 (0.07)          |
| <i>Sphingomonas paucimobilis</i>   | 0 (0)           | 0 (0)             | 0 (0)            | 0 (0)            | 1 (0.30)         | 0 (0)             | 1 (0.07)          |
| <i>Veillonella parvula</i>         | 0 (0)           | 0 (0)             | 0 (0)            | 0 (0)            | 0 (0)            | 1 (0.36)          | 1 (0.07)          |
| <i>Veillonella spp</i>             | 0 (0)           | 0 (0)             | 1 (0.39)         | 0 (0)            | 0 (0)            | 0 (0)             | 1 (0.07)          |
| <b>Fungi</b>                       | <b>8 (4.91)</b> | <b>22 (11.17)</b> | <b>21 (8.27)</b> | <b>20 (8.66)</b> | <b>29 (8.71)</b> | <b>29 (10.32)</b> | <b>129 (8.84)</b> |

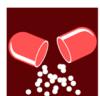

|                                                  |            |            |            |            |            |            |             |
|--------------------------------------------------|------------|------------|------------|------------|------------|------------|-------------|
| <i>Candida albicans</i>                          | 3 (1.84)   | 14 (7.11)  | 10 (3.94)  | 9 (3.90)   | 18 (5.41)  | 18 (6.41)  | 72 (4.93)   |
| <i>Candida glabrata</i>                          | 2 (1.23)   | 0 (0)      | 1 (0.39)   | 7 (3.03)   | 8 (2.40)   | 2 (0.71)   | 20 (1.37)   |
| <i>Candida tropicalis</i>                        | 3 (1.84)   | 5 (2.54)   | 5 (1.97)   | 1 (0.43)   | 1 (0.30)   | 3 (1.07)   | 18 (1.23)   |
| <i>Candida parapsilosis</i>                      | 0 (0)      | 2 (1.02)   | 2 (0.79)   | 2 (0.87)   | 1 (0.30)   | 4 (1.42)   | 11 (0.75)   |
| <i>Candida guilliermondii</i>                    | 0 (0)      | 0 (0)      | 0 (0)      | 0 (0)      | 1 (0.30)   | 1 (0.36)   | 2 (0.14)    |
| <i>Candida krusei</i>                            | 0 (0)      | 0 (0)      | 1 (0.39)   | 1 (0.43)   | 0 (0)      | 0 (0)      | 2 (0.14)    |
| <i>Candida lusitanae</i>                         | 0 (0)      | 0 (0)      | 1 (0.39)   | 0 (0)      | 0 (0)      | 1 (0.36)   | 2 (0.14)    |
| <i>Candida ciferrii</i>                          | 0 (0)      | 0 (0)      | 1 (0.39)   | 0 (0)      | 0 (0)      | 0 (0)      | 1 (0.07)    |
| <i>Candida kefyr</i>                             | 0 (0)      | 1 (0.51)   | 0 (0)      | 0 (0)      | 0 (0)      | 0 (0)      | 1 (0.07)    |
| <b>Number of pathogens (% of total isolates)</b> | 163 (11.2) | 197 (13.5) | 254 (17.4) | 231 (15.8) | 333 (22.8) | 281 (19.3) | 1,459 (100) |



**Table set S2.** Antimicrobial resistance of the most common microorganisms isolated from patients' samples.

| <i>Enterococcus faecalis</i>    | Antimicrobial Resistance (%) |
|---------------------------------|------------------------------|
| Ampicillin                      | 4,938272                     |
| Chloramphenicol                 | 11,538460                    |
| Ciprofloxacin                   | 34,868420                    |
| Clindamycin                     | 100,000000                   |
| Erythromycin                    | 40,789470                    |
| Fusidic acid                    | 15,384610                    |
| Gentamicin                      | 100,000000                   |
| Gentamicin (High Level Synergy) | 32,876710                    |
| Imipenem                        | 4,098361                     |
| Meropenem                       | 0,000000                     |
| Moxifloxacin                    | 31,788080                    |
| Oxacillin                       | 100,000000                   |
| Penicillin                      | 15,950920                    |
| Piperacillin                    | 0,000000                     |
| Piperacillin/tazobactam         | 0,000000                     |
| Teicoplanin                     | 1,226994                     |
| Tetracycline                    | 73,076920                    |
| Ticarcillin                     | 100,000000                   |
| Ticarcillin+Clavulanic acid     | 0,000000                     |
| Tigecycline                     | 0,000000                     |
| Tobramycin                      | 100,000000                   |
| Trimethoprim+Sulfamethoxazole   | 100,000000                   |
| Vancomycin                      | 3,680982                     |



| <i>Enterococcus faecium</i>     | Antimicrobial resistance (%) |
|---------------------------------|------------------------------|
| Ampicillin                      | 79,527560                    |
| Cefuroxime                      | 100,000000                   |
| Chloramphenicol                 | 0,000000                     |
| Ciprofloxacin                   | 83,486240                    |
| Clindamycin                     | 100,000000                   |
| Erythromycin                    | 83,636360                    |
| Fusidic acid                    | 0,000000                     |
| Gentamicin                      | 100,000000                   |
| Gentamicin (High Level Synergy) | 46,153850                    |
| Imipenem                        | 84,337350                    |
| Levofloxacin                    | 0,000000                     |
| Moxifloxacin                    | 81,818180                    |
| Oxacillin                       | 100,000000                   |
| Penicillin                      | 85,826770                    |
| Teicoplanin                     | 32,283470                    |
| Tetracycline                    | 34,615380                    |
| Tigecycline                     | 3,296703                     |
| Tobramycin                      | 100,000000                   |
| Trimethoprim+Sulfamethoxazole   | 100,000000                   |
| Vancomycin                      | 33,858270                    |



---

| <i>Staphylococcus epidermidis</i> | Antimicrobial resistance (%) |
|-----------------------------------|------------------------------|
| Cefuroxime                        | 100,000000                   |
| Chloramphenicol                   | 0,000000                     |
| Ciprofloxacin                     | 50,000000                    |
| Clindamycin                       | 55,844150                    |
| Erythromycin                      | 73,529410                    |
| Fusidic acid                      | 85,135130                    |
| Gentamicin                        | 24,418600                    |
| Imipenem                          | 100,000000                   |
| Levofloxacin                      | 53,731340                    |
| Oxacillin                         | 84,705880                    |
| Penicillin                        | 98,823530                    |
| Teicoplanin                       | 0,000000                     |
| Tetracycline                      | 18,666670                    |
| Tigecycline                       | 0,000000                     |
| Tobramycin                        | 22,580640                    |
| Trimethoprim+Sulfamethoxazole     | 27,272730                    |
| Vancomycin                        | 0,000000                     |



---

| <i>Staphylococcus aureus</i>  | Antimicrobial resistance (%) |
|-------------------------------|------------------------------|
| Amikacin                      | 0,000000                     |
| Chloramphenicol               | 10,000000                    |
| Clindamycin                   | 25,641030                    |
| Erythromycin                  | 25,641030                    |
| Fusidic acid                  | 21,052630                    |
| Gentamicin                    | 9,090909                     |
| Levofloxacin                  | 37,037040                    |
| Moxifloxacin                  | 28,571430                    |
| Oxacillin                     | 34,883720                    |
| Penicillin                    | 81,395350                    |
| Teicoplanin                   | 0,000000                     |
| Tetracycline                  | 10,256410                    |
| Tigecycline                   | 0,000000                     |
| Tobramycin                    | 28,571430                    |
| Trimethoprim+Sulfamethoxazole | 2,564103                     |
| Vancomycin                    | 0,000000                     |

---



| <i>Streptococcus anginosus</i>  | Antimicrobial resistance (%) |
|---------------------------------|------------------------------|
| Ampicillin                      | 0,000000                     |
| Cefuroxime                      | 0,000000                     |
| Chloramphenicol                 | 0,000000                     |
| Ciprofloxacin                   | 3,333333                     |
| Clindamycin                     | 23,333330                    |
| Erythromycin                    | 23,333330                    |
| Fusidic acid                    | 0,000000                     |
| Gentamicin                      | 93,333340                    |
| Gentamicin (High Level Synergy) | 0,000000                     |
| Moxifloxacin                    | 0,000000                     |
| Oxacillin                       | 100,000000                   |
| Penicillin                      | 7,142857                     |
| Teicoplanin                     | 0,000000                     |
| Tetracycline                    | 43,333330                    |
| Tigecycline                     | 0,000000                     |
| Tobramycin                      | 100,000000                   |
| Trimethoprim+Sulfamethoxazole   | 13,333330                    |
| Vancomycin                      | 0,000000                     |



---

| <i>Staphylococcus haemolyticus</i> | Antimicrobial resistance (%) |
|------------------------------------|------------------------------|
| Chloramphenicol                    | 0,000000                     |
| Clindamycin                        | 88,235290                    |
| Erythromycin                       | 87,500000                    |
| Fusidic acid                       | 76,470590                    |
| Gentamicin                         | 60,869560                    |
| Levofloxacin                       | 100,000000                   |
| Moxifloxacin                       | 22,222220                    |
| Oxacillin                          | 95,652180                    |
| Penicillin                         | 100,000000                   |
| Teicoplanin                        | 0,000000                     |
| Tetracycline                       | 5,882353                     |
| Tigecycline                        | 0,000000                     |
| Tobramycin                         | 55,555560                    |
| Trimethoprim+Sulfamethoxazole      | 58,823530                    |
| Vancomycin                         | 0,000000                     |

---



---

| <i>Staphylococcus hominis</i> | Antimicrobial resistance (%) |
|-------------------------------|------------------------------|
| Chloramphenicol               | 0,000000                     |
| Clindamycin                   | 70,000000                    |
| Erythromycin                  | 84,210530                    |
| Fusidic acid                  | 84,210530                    |
| Gentamicin                    | 8,695652                     |
| Levofloxacin                  | 52,631580                    |
| Metronidazole                 | 100,000000                   |
| Moxifloxacin                  | 20,000000                    |
| Oxacillin                     | 81,818180                    |
| Penicillin                    | 95,652180                    |
| Teicoplanin                   | 0,000000                     |
| Tetracycline                  | 20,000000                    |
| Tigecycline                   | 0,000000                     |
| Tobramycin                    | 60,000000                    |
| Trimethoprim+Sulfamethoxazole | 35,000000                    |
| Vancomycin                    | 0,000000                     |

---



---

| <i>Streptococcus constellatus</i> | Antimicrobial resistance (%) |
|-----------------------------------|------------------------------|
| Ampicillin                        | 0,000000                     |
| Cefuroxime                        | 0,000000                     |
| Chloramphenicol                   | 0,000000                     |
| Ciprofloxacin                     | 6,250000                     |
| Clindamycin                       | 12,500000                    |
| Erythromycin                      | 18,750000                    |
| Fusidic acid                      | 0,000000                     |
| Gentamicin                        | 87,500000                    |
| Gentamicin (High Level Synergy)   | 0,000000                     |
| Moxifloxacin                      | 0,000000                     |
| Oxacillin                         | 100,000000                   |
| Penicillin                        | 6,250000                     |
| Teicoplanin                       | 0,000000                     |
| Tetracycline                      | 18,750000                    |
| Tigecycline                       | 0,000000                     |
| Tobramycin                        | 100,000000                   |
| Trimethoprim+Sulfamethoxazole     | 0,000000                     |
| Vancomycin                        | 0,000000                     |





---

| <i>Enterococcus avium</i>       | Antimicrobial resistance (%) |
|---------------------------------|------------------------------|
| Amikacin                        | 100,000000                   |
| Ampicillin                      | 0,000000                     |
| Chloramphenicol                 | 0,000000                     |
| Ciprofloxacin                   | 7,142857                     |
| Clindamycin                     | 100,000000                   |
| Erythromycin                    | 7,142857                     |
| Fusidic acid                    | 37,500000                    |
| Gentamicin                      | 100,000000                   |
| Gentamicin (High Level Synergy) | 0,000000                     |
| Imipenem                        | 0,000000                     |
| Moxifloxacin                    | 7,142857                     |
| Penicillin                      | 14,285710                    |
| Teicoplanin                     | 0,000000                     |
| Tetracycline                    | 50,000000                    |
| Tigecycline                     | 0,000000                     |
| Tobramycin                      | 100,000000                   |
| Trimethoprim+Sulfamethoxazole   | 100,000000                   |
| Vancomycin                      | 0,000000                     |

---



| <i>Streptococcus mitis</i>      | Antimicrobial resistance (%) |
|---------------------------------|------------------------------|
| Ampicillin                      | 9,090909                     |
| Cefuroxime                      | 0,000000                     |
| Chloramphenicol                 | 0,000000                     |
| Ciprofloxacin                   | 50,000000                    |
| Clindamycin                     | 16,666670                    |
| Erythromycin                    | 16,666670                    |
| Fusidic acid                    | 8,333333                     |
| Gentamicin                      | 100,000000                   |
| Gentamicin (High Level Synergy) | 0,000000                     |
| Moxifloxacin                    | 0,000000                     |
| Oxacillin                       | 100,000000                   |
| Penicillin                      | 16,666670                    |
| Teicoplanin                     | 0,000000                     |
| Tetracycline                    | 16,666670                    |
| Tigecycline                     | 0,000000                     |
| Tobramycin                      | 100,000000                   |
| Trimethoprim+Sulfamethoxazole   | 8,333333                     |
| Vancomycin                      | 0,000000                     |



---

| <i>Enterococcus gallinarum</i>  | Antimicrobial resistance (%) |
|---------------------------------|------------------------------|
| Ampicillin                      | 33,333330                    |
| Chloramphenicol                 | 0,000000                     |
| Ciprofloxacin                   | 50,000000                    |
| Clindamycin                     | 85,714290                    |
| Erythromycin                    | 33,333330                    |
| Fusidic acid                    | 100,000000                   |
| Gentamicin                      | 100,000000                   |
| Gentamicin (High Level Synergy) | 25,000000                    |
| Imipenem                        | 45,454540                    |
| Moxifloxacin                    | 41,666670                    |
| Penicillin                      | 33,333330                    |
| Teicoplanin                     | 58,333330                    |
| Tetracycline                    | 0,000000                     |
| Tigecycline                     | 0,000000                     |
| Tobramycin                      | 100,000000                   |
| Trimethoprim+Sulfamethoxazole   | 83,333340                    |
| Vancomycin                      | 83,333340                    |

---



| <i>Streptococcus salivarius</i> | Antimicrobial resistance (%) |
|---------------------------------|------------------------------|
| Ampicillin                      | 0,000000                     |
| Cefuroxime                      | 0,000000                     |
| Chloramphenicol                 | 0,000000                     |
| Ciprofloxacin                   | 11,111110                    |
| Clindamycin                     | 0,000000                     |
| Erythromycin                    | 55,555560                    |
| Fusidic acid                    | 0,000000                     |
| Gentamicin                      | 77,777780                    |
| Gentamicin (High Level Synergy) | 0,000000                     |
| Moxifloxacin                    | 0,000000                     |
| Oxacillin                       | 100,000000                   |
| Penicillin                      | 33,333330                    |
| Teicoplanin                     | 0,000000                     |
| Tetracycline                    | 0,000000                     |
| Tigecycline                     | 0,000000                     |
| Tobramycin                      | 100,000000                   |
| Trimethoprim+Sulfamethoxazole   | 44,444440                    |
| Vancomycin                      | 0,000000                     |



---

| <i>Staphylococcus lugdunensis</i> | Antimicrobial resistance (%) |
|-----------------------------------|------------------------------|
| Chloramphenicol                   | 0,000000                     |
| Clindamycin                       | 16,666670                    |
| Erythromycin                      | 16,666670                    |
| Fusidic acid                      | 0,000000                     |
| Gentamicin                        | 0,000000                     |
| Levofloxacin                      | 0,000000                     |
| Moxifloxacin                      | 0,000000                     |
| Oxacillin                         | 0,000000                     |
| Penicillin                        | 50,000000                    |
| Teicoplanin                       | 0,000000                     |
| Tetracycline                      | 0,000000                     |
| Tigecycline                       | 0,000000                     |
| Tobramycin                        | 0,000000                     |
| Trimethoprim+Sulfamethoxazole     | 0,000000                     |
| Vancomycin                        | 0,000000                     |



| <i>Escherichia coli</i>     | Antimicrobial resistance (%) |
|-----------------------------|------------------------------|
| Amikacin                    | 6,726458                     |
| Amoxicillin+Clavulanic acid | 25,570780                    |
| Ampicillin                  | 52,017940                    |
| Aztreonam                   | 14,798210                    |
| Cefalotin                   | 27,450980                    |
| Cefepime                    | 12,612610                    |
| Cefotaxime                  | 14,864870                    |
| Cefoxitin                   | 11,616160                    |
| Ceftazidime                 | 14,349780                    |
| Ceftriaxone                 | 15,246640                    |
| Cefuroxime                  | 17,488790                    |
| Chloramphenicol             | 8,968610                     |
| Ciprofloxacin               | 29,797980                    |
| Colistin                    | 0,000000                     |
| Gentamicin                  | 10,454550                    |
| Imipenem                    | 1,010101                     |
| Levofloxacin                | 29,608940                    |
| Meropenem                   | 0,9049774                    |
| Metronidazole               | 50,000000                    |
| Moxifloxacin                | 29,292930                    |
| Penicillin                  | 100,000000                   |
| Piperacillin                | 47,712420                    |
| Piperacillin/tazobactam     | 8,163265                     |



---

|                               |           |
|-------------------------------|-----------|
| Tetracycline                  | 45,454540 |
| Ticarcillin                   | 50,657890 |
| Ticarcillin+Clavulanic acid   | 16,339870 |
| Tigecycline                   | 0,5076142 |
| Tobramycin                    | 14,349780 |
| Trimethoprim+Sulfamethoxazole | 28,282830 |



| <i>Pseudomonas aeruginosa</i>   | Antimicrobial resistance (%) |
|---------------------------------|------------------------------|
| Amikacin                        | 2,298851                     |
| Amoxicillin+Clavulanic acid     | 20,000000                    |
| Ampicillin                      | 33,333330                    |
| Aztreonam                       | 21,428570                    |
| Cefalotin                       | 66,666660                    |
| Cefepime                        | 13,793100                    |
| Cefotaxime                      | 95,652180                    |
| Cefoxitin                       | 100,000000                   |
| Ceftazidime                     | 14,942530                    |
| Ceftriaxone                     | 91,304340                    |
| Cefuroxime                      | 33,333330                    |
| Chloramphenicol                 | 25,000000                    |
| Ciprofloxacin                   | 22,500000                    |
| Clindamycin                     | 50,000000                    |
| Colistin                        | 1,162791                     |
| Erythromycin                    | 50,000000                    |
| Fusidic acid                    | 0,000000                     |
| Gentamicin                      | 1,149425                     |
| Gentamicin (High Level Synergy) | 0,000000                     |
| Imipenem                        | 12,500000                    |
| Levofloxacin                    | 100,000000                   |
| Meropenem                       | 10,344830                    |
| Moxifloxacin                    | 39,130440                    |





---

|                               |            |
|-------------------------------|------------|
| Penicillin                    | 50,000000  |
| Piperacillin                  | 15,116280  |
| Piperacillin/tazobactam       | 8,450705   |
| Tetracycline                  | 25,000000  |
| Ticarcillin                   | 31,034480  |
| Ticarcillin+Clavulanic acid   | 27,848100  |
| Tigecycline                   | 100,000000 |
| Tobramycin                    | 2,325581   |
| Trimethoprim+Sulfamethoxazole | 98,734180  |



| <i>Enterobacter cloacae</i> | Antimicrobial resistance (%) |
|-----------------------------|------------------------------|
| Amikacin                    | 4,761905                     |
| Amoxicillin+Clavulanic acid | 100,000000                   |
| Ampicillin                  | 100,000000                   |
| Aztreonam                   | 39,682540                    |
| Cefalotin                   | 100,000000                   |
| Cefepime                    | 14,285710                    |
| Cefotaxime                  | 41,935480                    |
| Cefoxitin                   | 100,000000                   |
| Ceftazidime                 | 39,682540                    |
| Ceftriaxone                 | 44,444440                    |
| Cefuroxime                  | 96,825390                    |
| Chloramphenicol             | 4,761905                     |
| Ciprofloxacin               | 0,000000                     |
| Colistin                    | 1,612903                     |
| Gentamicin                  | 0,000000                     |
| Imipenem                    | 6,896552                     |
| Levofloxacin                | 0,000000                     |
| Meropenem                   | 6,349206                     |
| Moxifloxacin                | 1,724138                     |
| Piperacillin                | 43,181820                    |
| Piperacillin/tazobactam     | 39,655170                    |
| Tetracycline                | 12,068970                    |
| Ticarcillin                 | 50,000000                    |



---

|                               |           |
|-------------------------------|-----------|
| Ticarcillin+Clavulanic acid   | 48,837210 |
| Tigecycline                   | 5,263158  |
| Tobramycin                    | 4,761905  |
| Trimethoprim+Sulfamethoxazole | 3,448276  |



| <i>Klebsiella pneumoniae</i> | Antimicrobial resistance (%) |
|------------------------------|------------------------------|
| Amikacin                     | 28,947370                    |
| Amoxicillin+Clavulanic acid  | 40,259740                    |
| Ampicillin                   | 100,000000                   |
| Aztreonam                    | 34,615380                    |
| Cefalotin                    | 50,909090                    |
| Cefepime                     | 34,615380                    |
| Cefotaxime                   | 33,766240                    |
| Cefoxitin                    | 33,333330                    |
| Ceftazidime                  | 34,615380                    |
| Ceftriaxone                  | 34,615380                    |
| Cefuroxime                   | 39,743590                    |
| Chloramphenicol              | 34,615380                    |
| Ciprofloxacin                | 33,333330                    |
| Colistin                     | 10,389610                    |
| Gentamicin                   | 10,256410                    |
| Imipenem                     | 28,985510                    |
| Levofloxacin                 | 36,206900                    |
| Meropenem                    | 30,769230                    |
| Moxifloxacin                 | 33,333330                    |
| Piperacillin                 | 94,545460                    |
| Piperacillin/tazobactam      | 37,681160                    |
| Tetracycline                 | 17,391300                    |
| Ticarcillin                  | 100,000000                   |



---

|                               |           |
|-------------------------------|-----------|
| Ticarcillin+Clavulanic acid   | 43,396220 |
| Tigecycline                   | 11,940300 |
| Tobramycin                    | 32,051280 |
| Trimethoprim+Sulfamethoxazole | 21,739130 |



| <i>Proteus mirabilis</i>    | Antimicrobial resistance (%) |
|-----------------------------|------------------------------|
| Amikacin                    | 0,000000                     |
| Amoxicillin+Clavulanic acid | 14,285710                    |
| Ampicillin                  | 37,837840                    |
| Aztreonam                   | 8,108109                     |
| Cefalotin                   | 6,451613                     |
| Cefepime                    | 8,108109                     |
| Cefotaxime                  | 8,108109                     |
| Cefoxitin                   | 5,882353                     |
| Ceftazidime                 | 8,108109                     |
| Ceftriaxone                 | 8,108109                     |
| Cefuroxime                  | 10,810810                    |
| Chloramphenicol             | 18,918920                    |
| Ciprofloxacin               | 14,705880                    |
| Colistin                    | 100,000000                   |
| Gentamicin                  | 11,111110                    |
| Imipenem                    | 2,941176                     |
| Levofloxacin                | 6,451613                     |
| Meropenem                   | 2,702703                     |
| Moxifloxacin                | 44,117650                    |
| Piperacillin                | 22,580640                    |
| Piperacillin/tazobactam     | 3,030303                     |
| Tetracycline                | 100,000000                   |
| Ticarcillin                 | 35,483870                    |



---

|                               |           |
|-------------------------------|-----------|
| Ticarcillin+Clavulanic acid   | 3,225806  |
| Tigecycline                   | 94,117650 |
| Tobramycin                    | 5,405406  |
| Trimethoprim+Sulfamethoxazole | 29,411760 |



| <i>Enterobacter aerogenes</i> | Antimicrobial resistance (%) |
|-------------------------------|------------------------------|
| Amikacin                      | 0,000000                     |
| Amoxicillin+Clavulanic acid   | 100,000000                   |
| Ampicillin                    | 100,000000                   |
| Aztreonam                     | 29,166670                    |
| Cefalotin                     | 100,000000                   |
| Cefepime                      | 8,333333                     |
| Cefotaxime                    | 29,166670                    |
| Cefoxitin                     | 100,000000                   |
| Ceftazidime                   | 37,500000                    |
| Ceftriaxone                   | 37,500000                    |
| Cefuroxime                    | 100,000000                   |
| Chloramphenicol               | 0,000000                     |
| Ciprofloxacin                 | 0,000000                     |
| Colistin                      | 0,000000                     |
| Gentamicin                    | 0,000000                     |
| Imipenem                      | 0,000000                     |
| Levofloxacin                  | 0,000000                     |
| Meropenem                     | 0,000000                     |
| Moxifloxacin                  | 0,000000                     |
| Piperacillin                  | 26,315790                    |
| Piperacillin/tazobactam       | 29,166670                    |
| Tetracycline                  | 0,000000                     |
| Ticarcillin                   | 36,842110                    |





---

|                               |           |
|-------------------------------|-----------|
| Ticarcillin+Clavulanic acid   | 31,578950 |
| Tigecycline                   | 0,000000  |
| Tobramycin                    | 0,000000  |
| Trimethoprim+Sulfamethoxazole | 0,000000  |



---

| <i>Bacteroides fragilis</i> | Antimicrobial resistance (%) |
|-----------------------------|------------------------------|
| Amoxicillin+Clavulanic acid | 5,000000                     |
| Ampicillin                  | 100,000000                   |
| Cefepime                    | 100,000000                   |
| Cefotaxime                  | 95,000000                    |
| Cefoxitin                   | 15,000000                    |
| Chloramphenicol             | 0,000000                     |
| Clindamycin                 | 50,000000                    |
| Erythromycin                | 80,000000                    |
| Metronidazole               | 21,052630                    |
| Penicillin                  | 94,736840                    |
| Tetracycline                | 45,000000                    |
| Ticarcillin                 | 75,000000                    |
| Ticarcillin+Clavulanic acid | 5,000000                     |
| Vancomycin                  | 95,000000                    |

---



| <i>Citrobacter freundii</i> | Antimicrobial resistance (%) |
|-----------------------------|------------------------------|
| Amikacin                    | 5,555555                     |
| Amoxicillin+Clavulanic acid | 100,000000                   |
| Ampicillin                  | 100,000000                   |
| Aztreonam                   | 27,777780                    |
| Cefalotin                   | 100,000000                   |
| Cefepime                    | 16,666670                    |
| Cefotaxime                  | 27,777780                    |
| Cefoxitin                   | 100,000000                   |
| Ceftazidime                 | 27,777780                    |
| Ceftriaxone                 | 27,777780                    |
| Cefuroxime                  | 94,444440                    |
| Chloramphenicol             | 11,111110                    |
| Ciprofloxacin               | 11,111110                    |
| Colistin                    | 0,000000                     |
| Gentamicin                  | 11,111110                    |
| Imipenem                    | 11,111110                    |
| Levofloxacin                | 5,882353                     |
| Meropenem                   | 5,882353                     |
| Moxifloxacin                | 11,111110                    |
| Piperacillin                | 30,769230                    |
| Piperacillin/tazobactam     | 17,647060                    |
| Tetracycline                | 0,000000                     |
| Ticarcillin                 | 30,769230                    |



---

|                               |           |
|-------------------------------|-----------|
| Ticarcillin+Clavulanic acid   | 30,769230 |
| Tigecycline                   | 0,000000  |
| Tobramycin                    | 11,111110 |
| Trimethoprim+Sulfamethoxazole | 0,000000  |



| <i>Acinetobacter baumannii</i> | Antimicrobial resistance (%) |
|--------------------------------|------------------------------|
| Amikacin                       | 73,333340                    |
| Amoxicillin+Clavulanic acid    | 100,000000                   |
| Ampicillin                     | 100,000000                   |
| Aztreonam                      | 93,750000                    |
| Cefalotin                      | 100,000000                   |
| Cefepime                       | 68,750000                    |
| Cefotaxime                     | 68,750000                    |
| Cefoxitin                      | 100,000000                   |
| Ceftazidime                    | 68,750000                    |
| Ceftriaxone                    | 68,750000                    |
| Cefuroxime                     | 100,000000                   |
| Chloramphenicol                | 100,000000                   |
| Ciprofloxacin                  | 61,538460                    |
| Colistin                       | 18,750000                    |
| Gentamicin                     | 53,333330                    |
| Imipenem                       | 61,538460                    |
| Levofloxacin                   | 40,000000                    |
| Meropenem                      | 68,750000                    |
| Moxifloxacin                   | 61,538460                    |
| Piperacillin                   | 90,909090                    |
| Piperacillin/tazobactam        | 66,666660                    |
| Tetracycline                   | 61,538460                    |
| Ticarcillin                    | 81,818180                    |



---

|                               |           |
|-------------------------------|-----------|
| Ticarcillin+Clavulanic acid   | 72,727270 |
| Tigecycline                   | 15,384610 |
| Tobramycin                    | 56,250000 |
| Trimethoprim+Sulfamethoxazole | 61,538460 |



| <i>Klebsiella oxytoca</i>   | Antimicrobial resistance (%) |
|-----------------------------|------------------------------|
| Amikacin                    | 0,000000                     |
| Amoxicillin+Clavulanic acid | 0,000000                     |
| Ampicillin                  | 100,000000                   |
| Aztreonam                   | 6,250000                     |
| Cefalotin                   | 8,333333                     |
| Cefepime                    | 6,250000                     |
| Cefotaxime                  | 6,250000                     |
| Cefoxitin                   | 0,000000                     |
| Ceftazidime                 | 6,250000                     |
| Ceftriaxone                 | 6,250000                     |
| Cefuroxime                  | 12,500000                    |
| Chloramphenicol             | 0,000000                     |
| Ciprofloxacin               | 0,000000                     |
| Colistin                    | 0,000000                     |
| Gentamicin                  | 0,000000                     |
| Imipenem                    | 0,000000                     |
| Levofloxacin                | 0,000000                     |
| Meropenem                   | 0,000000                     |
| Moxifloxacin                | 0,000000                     |
| Piperacillin                | 100,000000                   |
| Piperacillin/tazobactam     | 0,000000                     |
| Tetracycline                | 0,000000                     |
| Ticarcillin                 | 100,000000                   |



---

|                               |          |
|-------------------------------|----------|
| Ticarcillin+Clavulanic acid   | 0,000000 |
| Tigecycline                   | 0,000000 |
| Tobramycin                    | 0,000000 |
| Trimethoprim+Sulfamethoxazole | 0,000000 |





| <i>Morganella morganii</i>  | Antimicrobial resistance (%) |
|-----------------------------|------------------------------|
| Amikacin                    | 0,000000                     |
| Amoxicillin+Clavulanic acid | 100,000000                   |
| Ampicillin                  | 100,000000                   |
| Aztreonam                   | 31,250000                    |
| Cefalotin                   | 100,000000                   |
| Cefepime                    | 13,333330                    |
| Cefotaxime                  | 25,000000                    |
| Cefoxitin                   | 33,333330                    |
| Ceftazidime                 | 26,666670                    |
| Ceftriaxone                 | 25,000000                    |
| Cefuroxime                  | 100,000000                   |
| Chloramphenicol             | 18,750000                    |
| Ciprofloxacin               | 26,666670                    |
| Colistin                    | 100,000000                   |
| Gentamicin                  | 6,250000                     |
| Imipenem                    | 0,000000                     |
| Levofloxacin                | 21,428570                    |
| Meropenem                   | 0,000000                     |
| Moxifloxacin                | 26,666670                    |
| Piperacillin                | 30,769230                    |
| Piperacillin/tazobactam     | 0,000000                     |
| Tetracycline                | 93,333340                    |
| Ticarcillin                 | 30,769230                    |



---

|                               |            |
|-------------------------------|------------|
| Ticarcillin+Clavulanic acid   | 15,384610  |
| Tigecycline                   | 100,000000 |
| Tobramycin                    | 0,000000   |
| Trimethoprim+Sulfamethoxazole | 33,333330  |



---

| <i>Bacteroides thetaiotaomicron</i> | Antimicrobial resistance (%) |
|-------------------------------------|------------------------------|
| Amoxicillin+Clavulanic acid         | 50,000000                    |
| Ampicillin                          | 87,500000                    |
| Cefepime                            | 100,000000                   |
| Cefotaxime                          | 87,500000                    |
| Cefoxitin                           | 75,000000                    |
| Chloramphenicol                     | 0,000000                     |
| Clindamycin                         | 66,666660                    |
| Erythromycin                        | 75,000000                    |
| Metronidazole                       | 12,500000                    |
| Penicillin                          | 100,000000                   |
| Tetracycline                        | 75,000000                    |
| Ticarcillin                         | 87,500000                    |
| Ticarcillin+Clavulanic acid         | 37,500000                    |
| Vancomycin                          | 100,000000                   |



---

| <i>Candida albicans</i> | Antimicrobial resistance (%) |
|-------------------------|------------------------------|
| Amphotericin B          | 0,000000                     |
| Caspofungin             | 2,777778                     |
| Fluconazole             | 5,555555                     |
| Flucytocine             | 1,388889                     |
| Metronidazole           | 100,000000                   |
| Micafungin              | 2,777778                     |
| Voriconazole            | 0,000000                     |



---

| <i>Candida glabrata</i> | Antimicrobial resistance (%) |
|-------------------------|------------------------------|
| Amphotericin B          | 0,000000                     |
| Caspofungin             | 0,000000                     |
| Fluconazole             | 27,777780                    |
| Flucytocine             | 0,000000                     |
| Micafungin              | 0,000000                     |
| Voriconazole            | 5,000000                     |



---

| <i>Candida tropicalis</i> | Antimicrobial resistance (%) |
|---------------------------|------------------------------|
| Amphotericin B            | 0,000000                     |
| Caspofungin               | 0,000000                     |
| Fluconazole               | 0,000000                     |
| Flucytocine               | 0,000000                     |
| Micafungin                | 0,000000                     |
| Voriconazole              | 0,000000                     |



---

| <i>Candida parapsilosis</i> | Antimicrobial resistance (%) |
|-----------------------------|------------------------------|
| Amphotericin B              | 0,000000                     |
| Caspofungin                 | 0,000000                     |
| Fluconazole                 | 0,000000                     |
| Flucytocine                 | 0,000000                     |
| Micafungin                  | 0,000000                     |
| Voriconazole                | 0,000000                     |
